# Supplementary material for: Capturing quality of life in pouch anal and vaginal fistula: Development of PAVF-QoL-14, a patient-reported outcome measure
Source: Research Square preprint supplement (doi:10.21203/rs.3.rs-8500549/v1), 2026-01-27
Supplement: Supplementary file 5 [file fb1c6f14d9834d4a6d40a3a6.docx]

**Plain English Summary**

People who have an ileoanal pouch can sometimes develop a pouch anal or vaginal fistula, which is an abnormal connection that may cause ongoing discharge, pain, infections, and emotional distress. These symptoms can have a major impact on daily activities, relationships, work, and overall wellbeing. Despite this, there has been no questionnaire specifically designed to measure how pouch-related fistulas affect quality of life from the patient’s perspective.

In this study, we developed and tested a new questionnaire called the Pouch Anal and Vaginal Fistula Quality of Life questionnaire (PAVF-QoL-14). Patients with lived experience of pouch fistula were involved throughout the process, starting with interviews to identify the symptoms and concerns that mattered most to them. The questionnaire was then refined through patient feedback and expert review to ensure that the questions were clear, relevant, and easy to understand. We tested the questionnaire in a group of patients and showed that it is reliable, meaning people gave similar answers when their condition had not changed, and responsive, meaning scores changed appropriately when symptoms improved or worsened. The final questionnaire contains 14 questions covering areas such as symptoms, discharge, bowel control, tiredness, emotional wellbeing, intimacy, and worries about the future. PAVF-QoL-14 is a short, patient-centred tool that can be used in routine clinical care and in research studies to better understand the impact of pouch fistula and to assess whether treatments improve quality of life.
