# Supplementary figures and images for: Capturing quality of life in pouch anal and vaginal fistula: Development of PAVF-QoL-14, a patient-reported outcome measure
Source: Research Square preprint supplement (doi:10.21203/rs.3.rs-8500549/v1), 2026-01-27

**Supplementary Figure 1 Scree plot—PAVF -QoL-14 factor retention.**


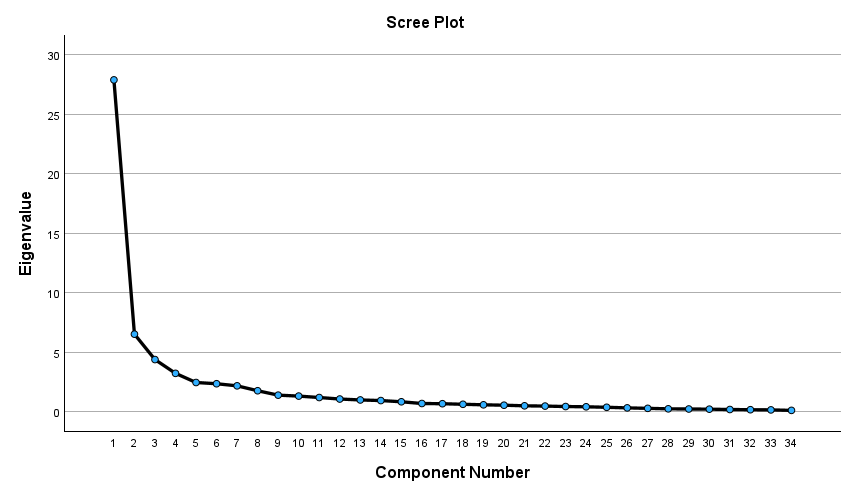

Supplement: Supplementary file 4 [file cd9cfd154bd0ba5ddeb94901.docx]
